# Supplementary material for: Insulin and insulin-like growth factors act as renal cell cancer intratumoral regulators
Source: PubMed Central journal article supplement (PMC6732138; doi:10.1007/s12079-019-00512-y), 2019-03-30

# 769-P

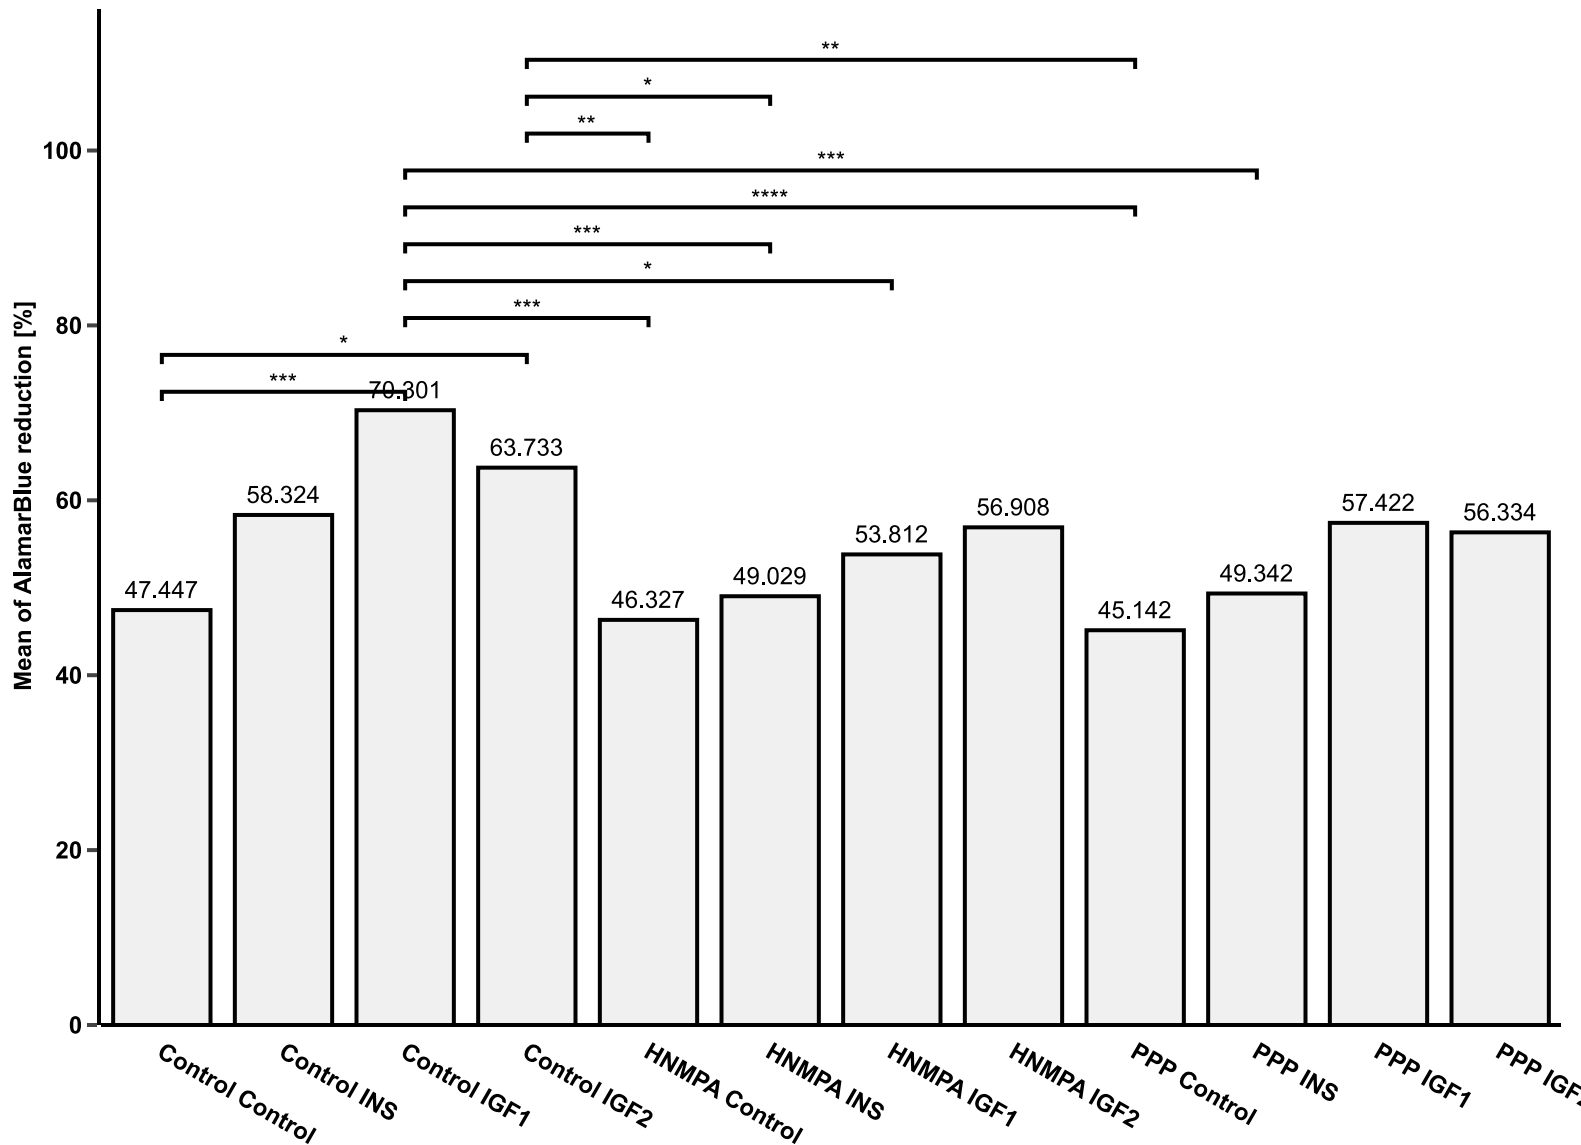

# 786-O

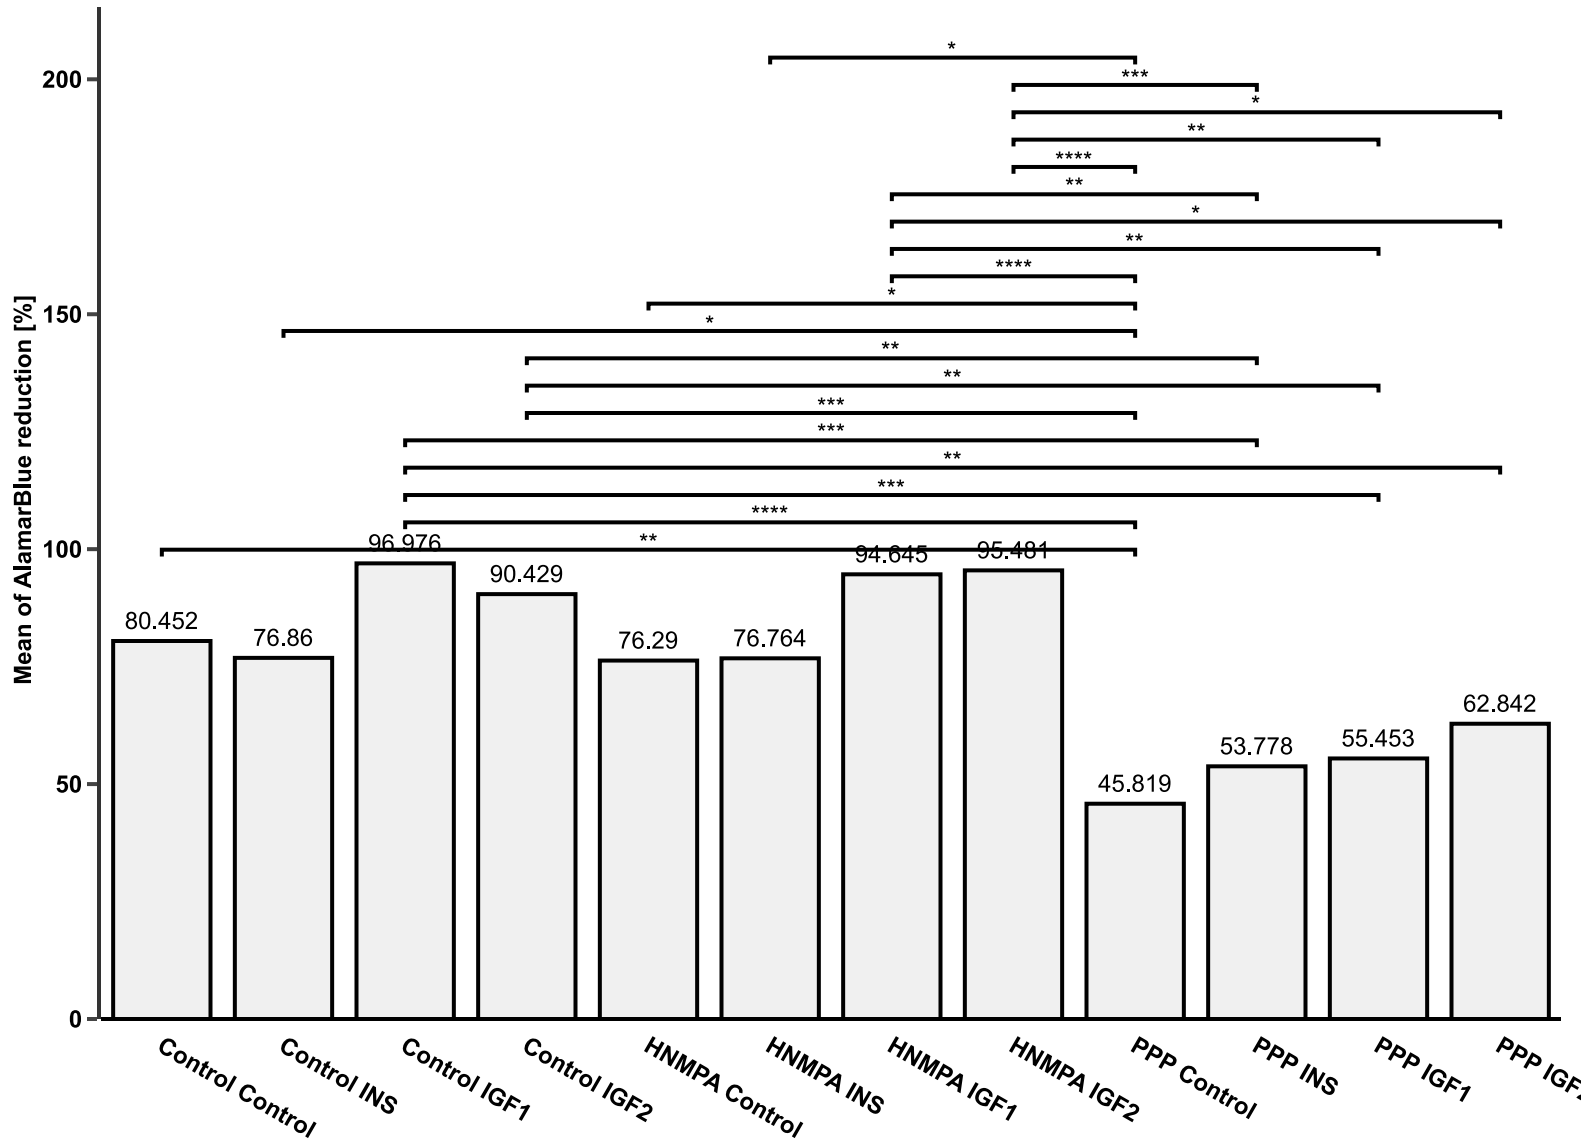

# PCS-400-010

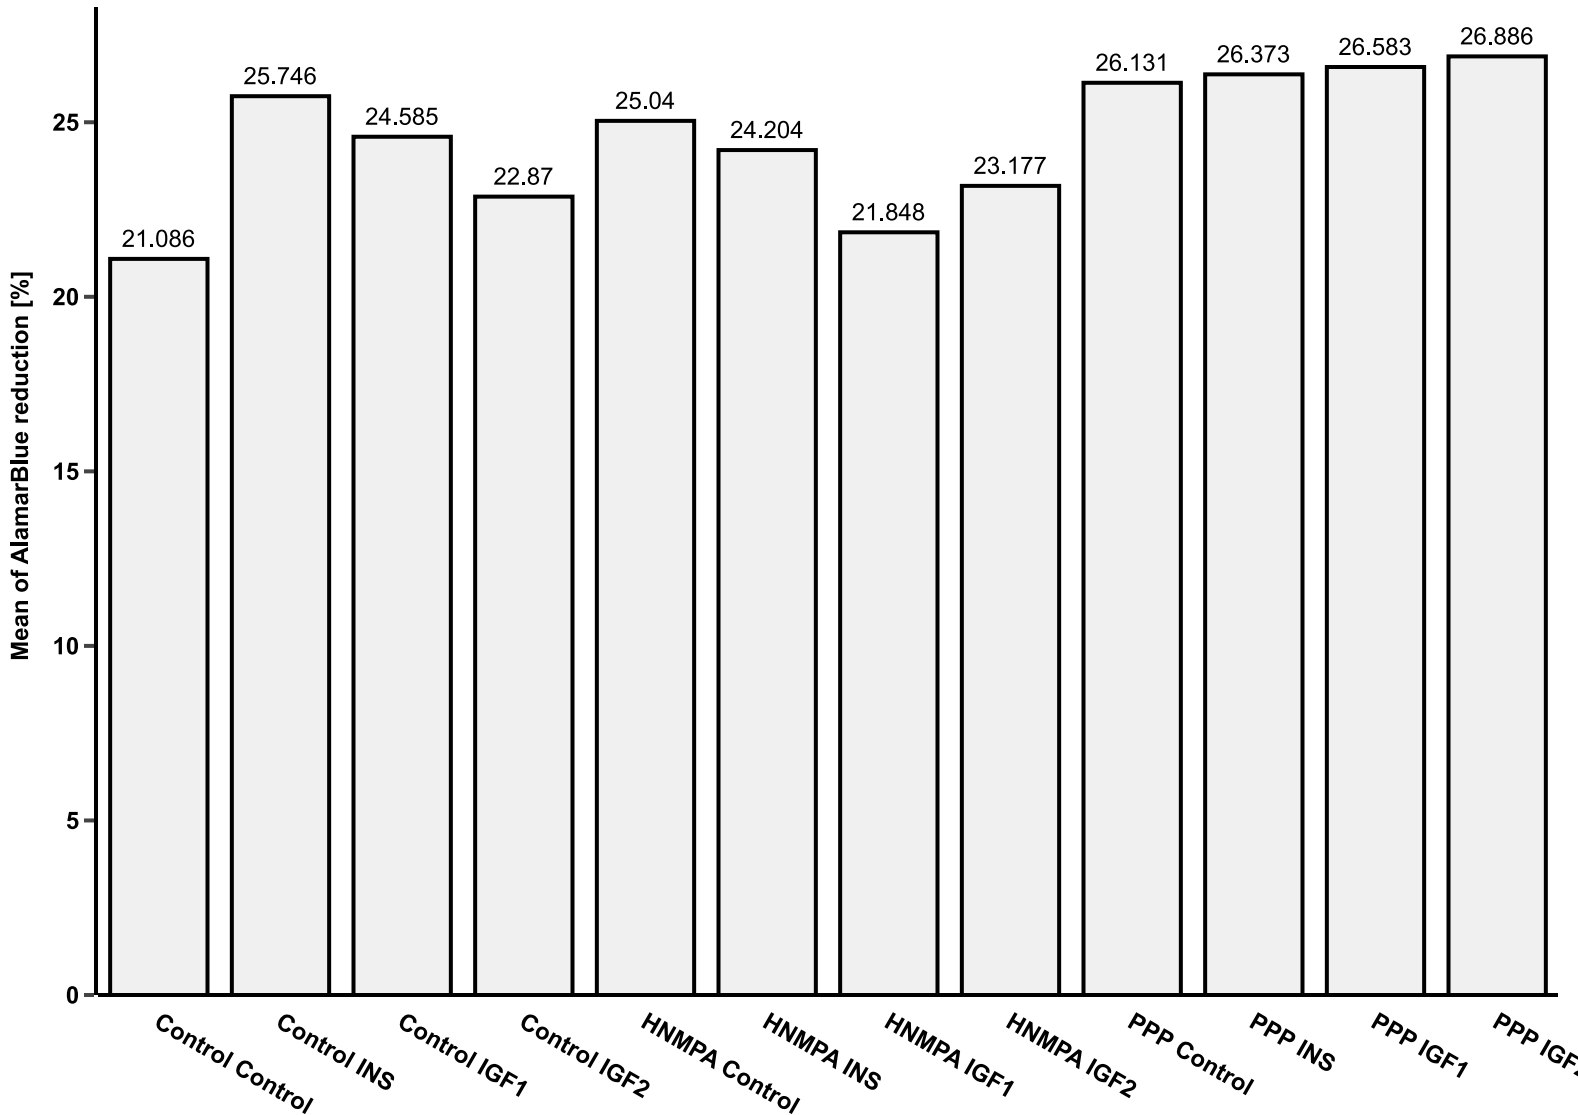

# ACHN

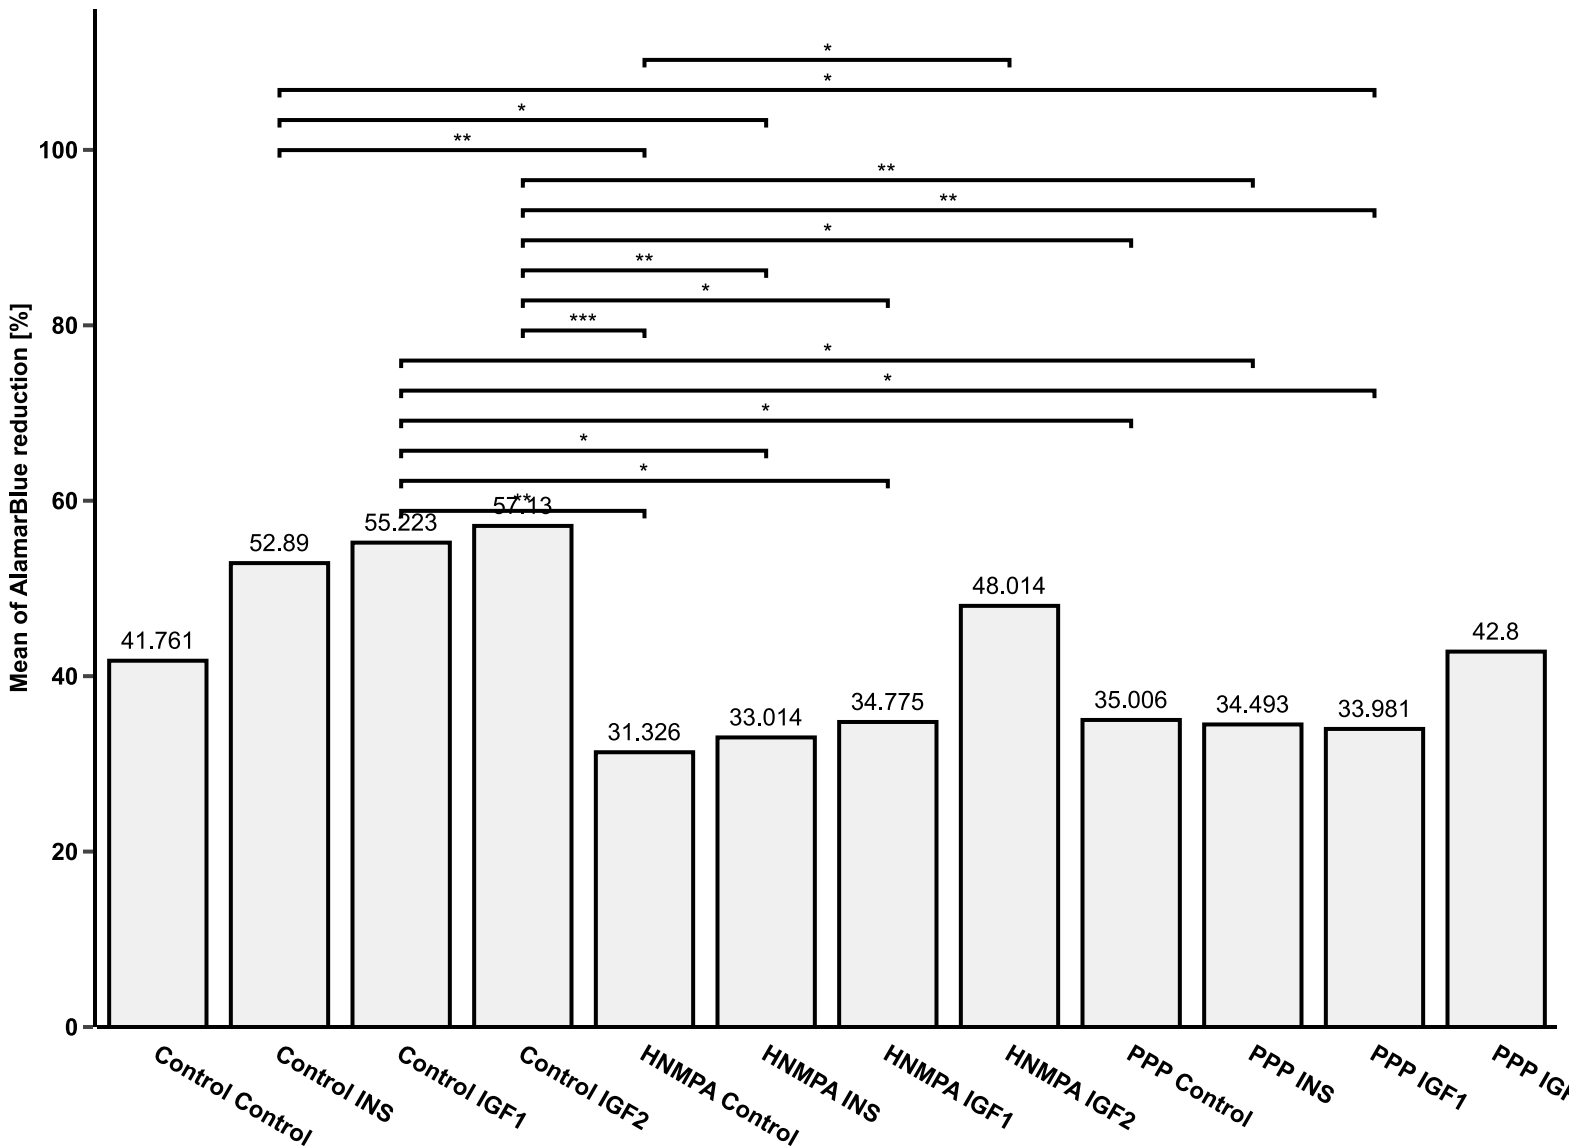

# HEK293

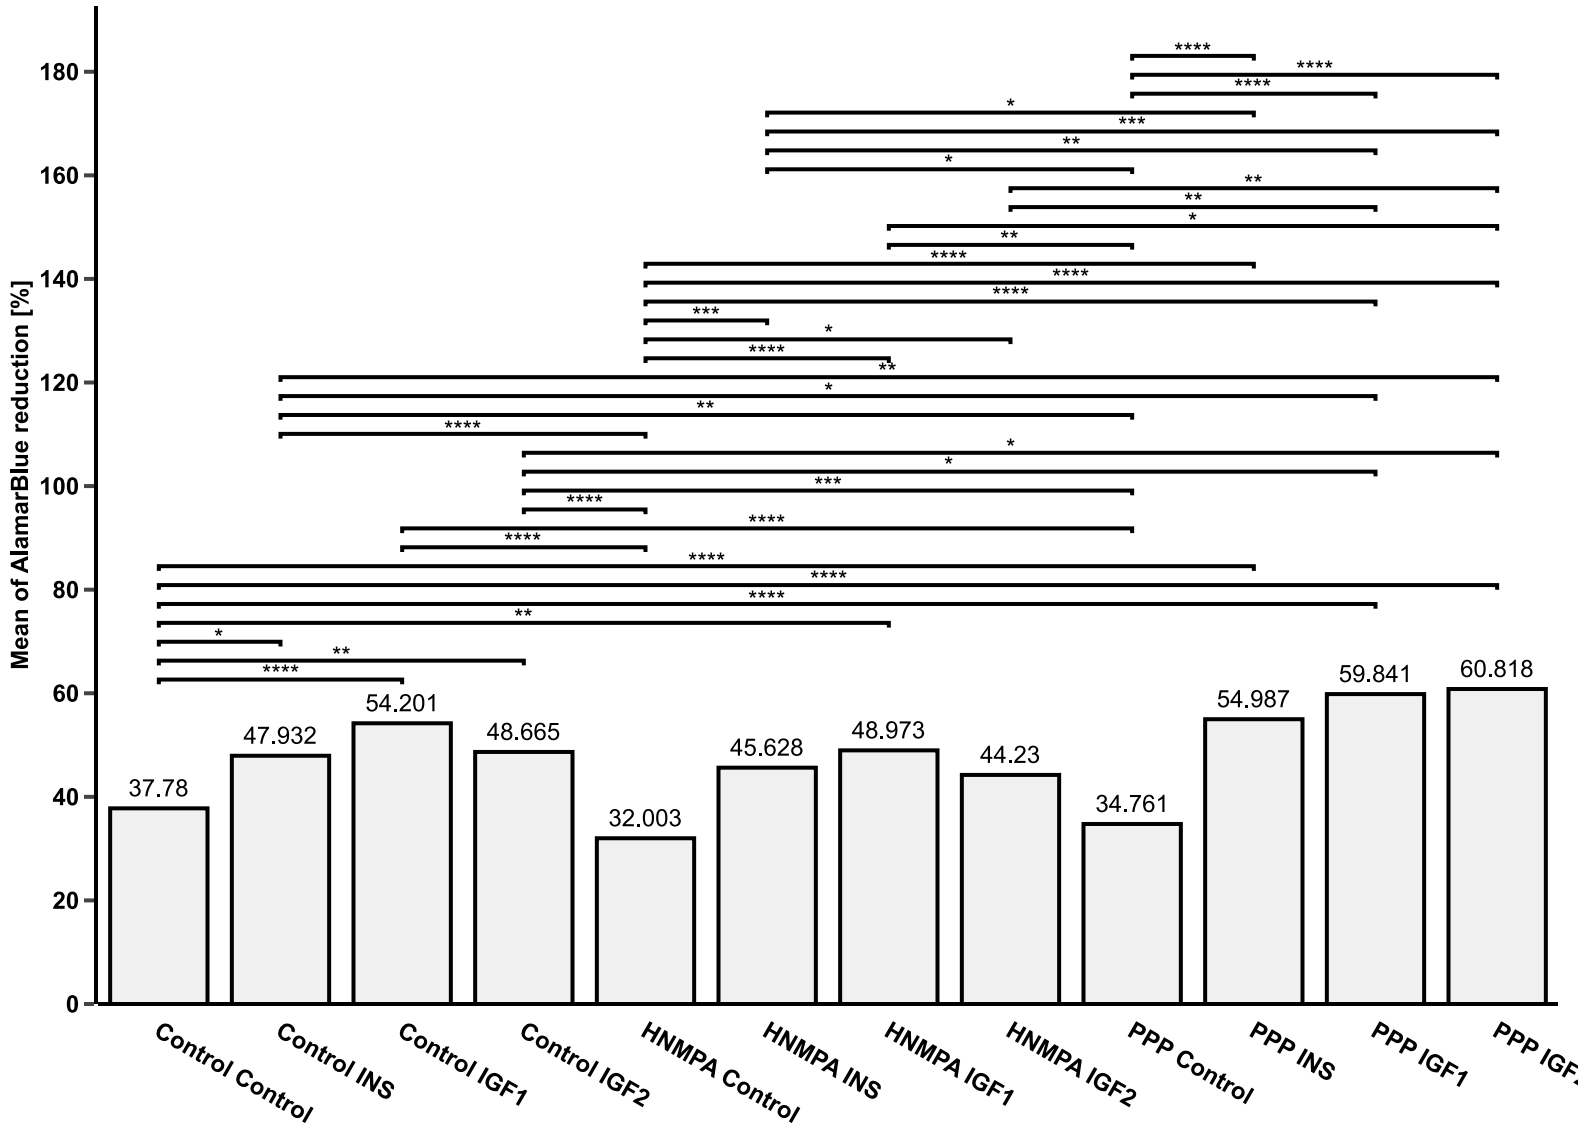

# CAKI-1

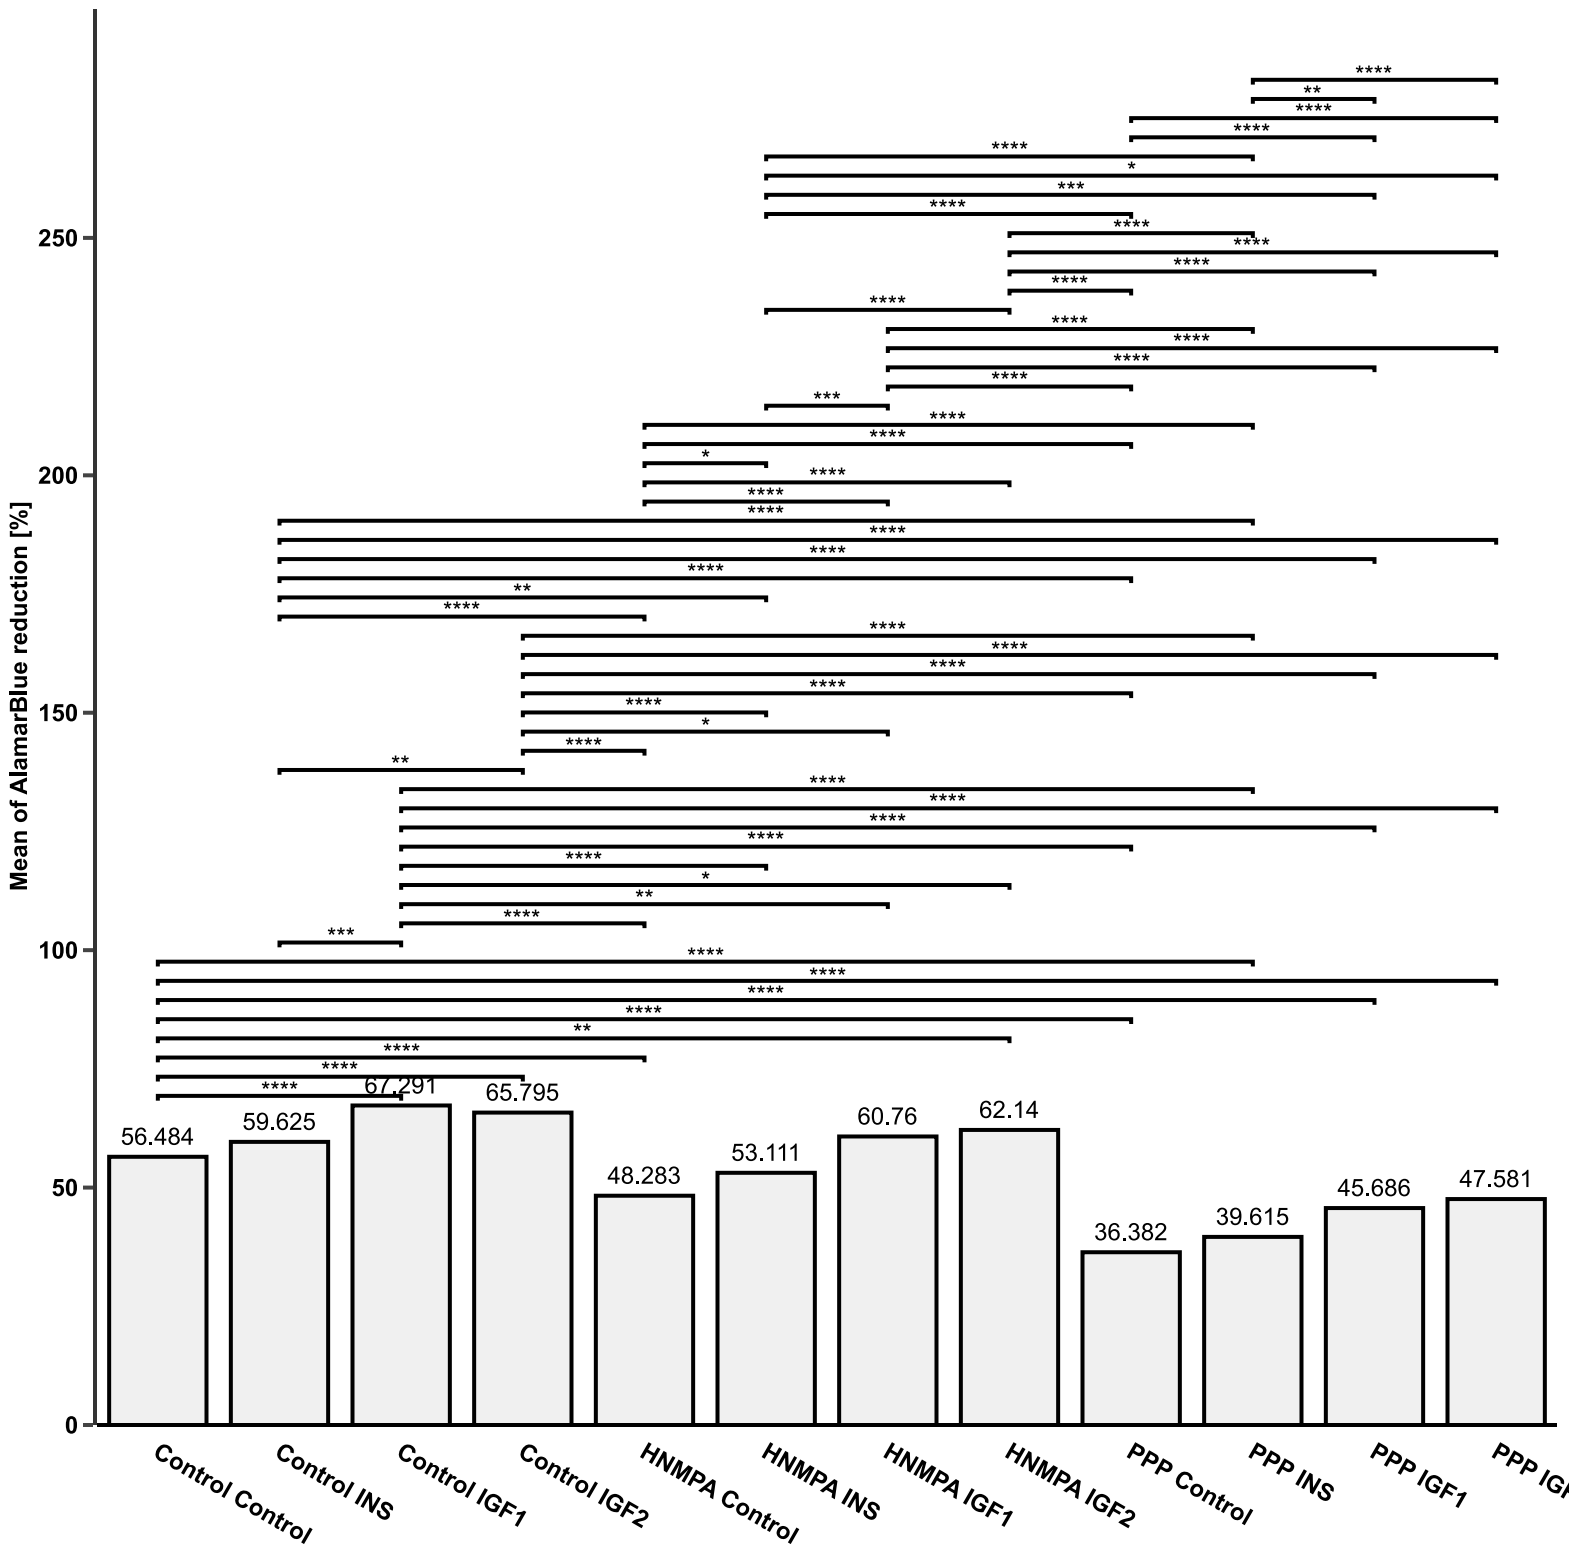

# CAKI-2

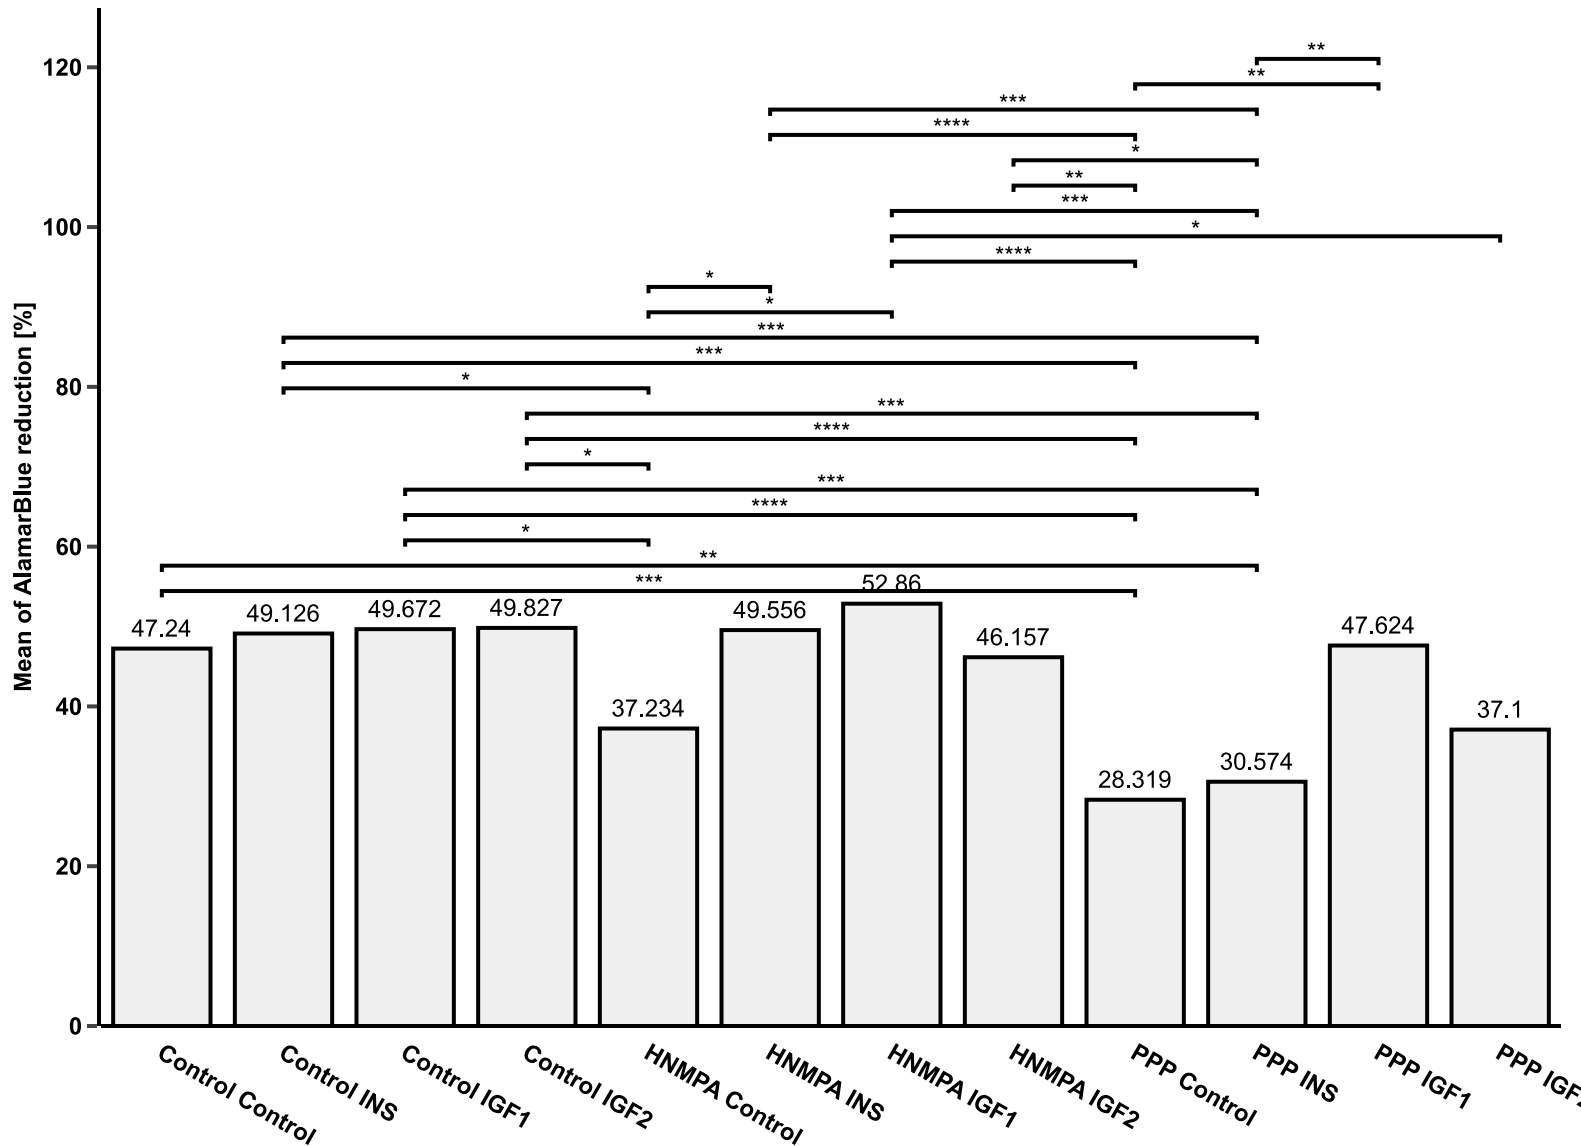

Supplement: 12079_2019_512_MOESM2_ESM.pdf [file 12079_2019_512_MOESM2_ESM.pdf]
